# Supplementary material for: Id4 promotes the elimination of the pro-activation factor Ascl1 to maintain quiescence of adult hippocampal stem cells
Source: PubMed Central journal article supplement (PMC6805120; doi:10.7554/elife.48561), 2019-09-25
Supplement: elife-48561-data1.pdf [file elife-48561-data1.pdf]

## Main Figures Summary Statistics

### Figure 1D

|                                     |                    |
|-------------------------------------|--------------------|
| Unpaired t test                     |                    |
| P value                             | 0.017              |
| P value summary                     | *                  |
| Significantly different (P < 0.05)? | Yes                |
| One- or two-tailed P value?         | Two-tailed         |
| t, df                               | t=3.937 df=4       |
| How big is the difference?          |                    |
| Mean ± SEM of column A              | 83.81 ± 4.111, n=3 |
| Mean ± SEM of column B              | 100 ± 0, n=3       |
| Difference between means            | 16.19 ± 4.111      |
| 95% confidence interval             | 4.772 to 27.6      |
| R squared (eta squared)             | 0.7949             |
| F test to compare variances         |                    |
| F, DFn, Dfd                         | Infinity, 2, 2     |
| P value                             | <0.0001            |
| P value summary                     | ****               |
| Significantly different (P < 0.05)? | Yes                |

### Figure 1E

|                                     |                      |
|-------------------------------------|----------------------|
| Unpaired t test                     |                      |
| P value                             | 0.4294               |
| P value summary                     | ns                   |
| Significantly different (P < 0.05)? | No                   |
| One- or two-tailed P value?         | Two-tailed           |
| t, df                               | t=0.7923 df=149      |
| How big is the difference?          |                      |
| Mean ± SEM of column G              | 92.78 ± 4.492, n=119 |
| Mean ± SEM of column H              | 100 ± 5.407, n=32    |
| Difference between means            | 7.223 ± 9.116        |
| 95% confidence interval             | -10.79 to 25.24      |
| R squared (eta squared)             | 0.004196             |
| F test to compare variances         |                      |
| F, DFn, Dfd                         | 2.566, 118, 31       |
| P value                             | 0.0034               |
| P value summary                     | **                   |
| Significantly different (P < 0.05)? | Yes                  |

### Figure 1G

|                                     |                      |
|-------------------------------------|----------------------|
| dots/nucleus                        |                      |
| Unpaired t test                     |                      |
| P value                             | 0.1018               |
| P value summary                     | ns                   |
| Significantly different (P < 0.05)? | No                   |
| One- or two-tailed P value?         | Two-tailed           |
| t, df                               | t=1.653 df=91        |
| How big is the difference?          |                      |
| Mean ± SEM of column A              | 3.95 ± 0.8413, n=20  |
| Mean ± SEM of column B              | 2.589 ± 0.3649, n=73 |
| Difference between means            | -1.361 ± 0.8234      |
| 95% confidence interval             | -2.997 to 0.2747     |
| R squared (eta squared)             | 0.02914              |
| F test to compare variances         |                      |
| F, DFn, Dfd                         | 1.457, 19, 72        |
| P value                             | 0.2577               |
| P value summary                     | ns                   |
| Significantly different (P < 0.05)? | No                   |

|                                     |                     |
|-------------------------------------|---------------------|
| Relative intensity/nucleus          |                     |
| Unpaired t test                     |                     |
| P value                             | 0.1128              |
| P value summary                     | ns                  |
| Significantly different (P < 0.05)? | No                  |
| One- or two-tailed P value?         | Two-tailed          |
| t, df                               | t=1.601 df=91       |
| How big is the difference?          |                     |
| Mean ± SEM of column J              | 100 ± 8.859, n=20   |
| Mean ± SEM of column K              | 86.51 ± 3.689, n=73 |
| Difference between means            | -13.49 ± 8.423      |
| 95% confidence interval             | -30.22 to 3.243     |
| R squared (eta squared)             | 0.02741             |
| F test to compare variances         |                     |
| F, DFn, Dfd                         | 1.58, 19, 72        |
| P value                             | 0.1704              |
| P value summary                     | ns                  |
| Significantly different (P < 0.05)? | No                  |

**Figure 2A**

|                                     |                      |
|-------------------------------------|----------------------|
| Unpaired t test                     |                      |
| P value                             | 0.9086               |
| P value summary                     | ns                   |
| Significantly different (P < 0.05)? | No                   |
| One- or two-tailed P value?         | Two-tailed           |
| t, df                               | t=0.1197 df=6        |
| How big is the difference?          |                      |
| Mean ± SEM of column A              | 1.003 ± 0.08642, n=4 |
| Mean ± SEM of column C              | 1.022 ± 0.1254, n=4  |
| Difference between means            | 0.01823 ± 0.1523     |
| 95% confidence interval             | -0.3543 to 0.3908    |
| R squared (eta squared)             | 0.002383             |
| F test to compare variances         |                      |
| F, DFn, Dfd                         | 2.104, 3, 3          |
| P value                             | 0.5569               |
| P value summary                     | ns                   |
| Significantly different (P < 0.05)? | No                   |

**Figure 2C**

|                                     |                      |
|-------------------------------------|----------------------|
| Unpaired t test                     |                      |
| P value                             | 0.0587               |
| P value summary                     | ns                   |
| Significantly different (P < 0.05)? | No                   |
| One- or two-tailed P value?         | Two-tailed           |
| t, df                               | t=1.899 df=244       |
| How big is the difference?          |                      |
| Mean ± SEM of column J              | 100 ± 15.11, n=133   |
| Mean ± SEM of column K              | 65.42 ± 8.571, n=113 |
| Difference between means            | -34.58 ± 18.2        |
| 95% confidence interval             | -70.43 to 1.28       |
| R squared (eta squared)             | 0.01457              |
| F test to compare variances         |                      |
| F, DFn, Dfd                         | 3.659, 132, 112      |
| P value                             | <0.0001              |
| P value summary                     | ****                 |
| Significantly different (P < 0.05)? | Yes                  |

**Figure 2E**

|                                     |                     |
|-------------------------------------|---------------------|
| Unpaired t test                     |                     |
| P value                             | 7.09E-08            |
| P value summary                     | ****                |
| Significantly different (P < 0.05)? | Yes                 |
| One- or two-tailed P value?         | Two-tailed          |
| t, df                               | t=5.66 df=156       |
| How big is the difference?          |                     |
| Mean ± SEM of column A              | 69.92 ± 4.128, n=79 |
| Mean ± SEM of column C              | 45.6 ± 1.197, n=79  |
| Difference between means            | -24.32 ± 4.298      |
| 95% confidence interval             | -32.81 to -15.83    |
| R squared (eta squared)             | 0.1703              |
| F test to compare variances         |                     |
| F, DFn, Dfd                         | 11.9, 78, 78        |
| P value                             | <0.0000000001       |
| P value summary                     | ****                |
| Significantly different (P < 0.05)? | Yes                 |

**Figure 2F**

|                                     |                      |
|-------------------------------------|----------------------|
| Unpaired t test                     |                      |
| P value                             | 0.0363               |
| P value summary                     | *                    |
| Significantly different (P < 0.05)? | Yes                  |
| One- or two-tailed P value?         | Two-tailed           |
| t, df                               | t=2.685 df=6         |
| How big is the difference?          |                      |
| Mean ± SEM of column D              | 1 ± 0.101, n=4       |
| Mean ± SEM of column E              | 0.4756 ± 0.1672, n=4 |
| Difference between means            | -0.5244 ± 0.1953     |
| 95% confidence interval             | -1.002 to -0.04642   |
| R squared (eta squared)             | 0.5457               |
| F test to compare variances         |                      |
| F, DFn, Dfd                         | 2.739, 3, 3          |
| P value                             | 0.4299               |
| P value summary                     | ns                   |
| Significantly different (P < 0.05)? | No                   |

**Figure 2G**

|            | Discovery?       | P value     | Mean1 | Mean2       |
|------------|------------------|-------------|-------|-------------|
| 0          |                  |             |       |             |
| 5          | No               | 0.387555649 | 1.178 | 1.435       |
| 10         | No               | 0.020728625 | 1.2   | 1.902       |
| 30         | No               | 0.026595256 | 1.084 | 3.106       |
| 60         | No               | 0.023656159 | 1.028 | 3.314       |
| 120        | No               | 0.232781025 | 1.169 | 2.391       |
| Difference | SE of difference | t ratio     | df    | q value     |
| -0.257     | 0.2653           | 0.9687      | 4     | 0.391431206 |
| -0.702     | 0.1894           | 3.706       | 4     | 0.044768682 |
| -2.022     | 0.5899           | 3.428       | 4     | 0.044768682 |
| -2.286     | 0.6427           | 3.557       | 4     | 0.044768682 |
| -1.222     | 0.8697           | 1.405       | 4     | 0.293886044 |

**Figure 3A**

|                                     |                     |                                     |                     |                                     |                     |
|-------------------------------------|---------------------|-------------------------------------|---------------------|-------------------------------------|---------------------|
| Column B vs. Column A               | Id1 BMP vs. Id1 FGF | Column D vs. Column C               | Id2 BMP vs. Id2 FGF | Column F vs. Column E               | Id3 BMP vs. Id3 FGF |
| Unpaired t test                     |                     | Unpaired t test                     |                     | Unpaired t test                     |                     |
| P value                             | *                   | P value                             | 0.0322              | P value                             | 0.0746              |
| P value summary                     | ns                  | P value summary                     | ns                  | P value summary                     | ***                 |
| Significantly different (P < 0.05)? | Yes                 | Significantly different (P < 0.05)? | No                  | Significantly different (P < 0.05)? | Yes                 |
| One- or two-tailed P value?         | Two-tailed          | One- or two-tailed P value?         | Two-tailed          | One- or two-tailed P value?         | Two-tailed          |
| t, df                               | t=3.221 df=4        | t, df                               | t=3.453 df=2        | t, df                               | t=9.348 df=4        |
| How big is the difference?          |                     | How big is the difference?          |                     | How big is the difference?          |                     |
| Mean ± SEM of column A              | 1 ± 0.3057, n=3     | Mean ± SEM of column C              | 1 ± 0.1197, n=2     | Mean ± SEM of column E              | 1 ± 0.1075, n=3     |
| Mean ± SEM of column B              | 13.73 ± 3.94, n=3   | Mean ± SEM of column D              | 8.156 ± 2.069, n=2  | Mean ± SEM of column F              | 6.8 ± 0.6111, n=3   |
| Difference between means            | 12.73 ± 3.952       | Difference between means            | 7.156 ± 2.073       | Difference between means            | 5.8 ± 0.6205        |
| 95% confidence interval             | 1.759 to 23.7       | 95% confidence interval             | -1.761 to 16.07     | 95% confidence interval             | 4.077 to 7.523      |
| R squared (eta squared)             | 0.7218              | R squared (eta squared)             | 0.8563              | R squared (eta squared)             | 0.9562              |
| F test to compare variances         |                     | F test to compare variances         |                     | F test to compare variances         |                     |
| F, DFn, Dfd                         | 166.1, 2, 2         | F, DFn, Dfd                         | 0.012               | F, DFn, Dfd                         | 32.29, 2, 2         |
| P value                             | *                   | P value                             | ns                  | P value                             | 0.0601              |
| P value summary                     | *                   | P value summary                     | ns                  | P value summary                     | ns                  |
| Significantly different (P < 0.05)? | Yes                 | Significantly different (P < 0.05)? | No                  | Significantly different (P < 0.05)? | No                  |
| Column H vs. Column G               | Id4 BMP vs. Id4 FGF |                                     |                     |                                     |                     |
| Unpaired t test                     |                     |                                     |                     |                                     |                     |
| P value                             | **                  |                                     |                     |                                     |                     |
| P value summary                     | ****                |                                     |                     |                                     |                     |
| Significantly different (P < 0.05)? | Yes                 |                                     |                     |                                     |                     |
| One- or two-tailed P value?         | Two-tailed          |                                     |                     |                                     |                     |
| t, df                               | t=7.418 df=4        |                                     |                     |                                     |                     |
| How big is the difference?          |                     |                                     |                     |                                     |                     |
| Mean ± SEM of column G              | 1 ± 0.281, n=3      |                                     |                     |                                     |                     |
| Mean ± SEM of column H              | 27.44 ± 3.553, n=3  |                                     |                     |                                     |                     |
| Difference between means            | 26.44 ± 3.564       |                                     |                     |                                     |                     |
| 95% confidence interval             | 16.54 to 36.33      |                                     |                     |                                     |                     |
| R squared (eta squared)             | 0.9322              |                                     |                     |                                     |                     |
| F test to compare variances         |                     |                                     |                     |                                     |                     |
| F, DFn, Dfd                         | 159.9, 2, 2         |                                     |                     |                                     |                     |
| P value                             | *                   |                                     |                     |                                     |                     |
| P value summary                     | *                   |                                     |                     |                                     |                     |
| Significantly different (P < 0.05)? | Yes                 |                                     |                     |                                     |                     |

**Figure 3C**

Unpaired t test  
P value 0.000753309  
P value summary \*\*\*  
Significantly different (P < 0.05)? Yes  
One- or two-tailed P value? Two-tailed  
t, df t=6.288 df=6

How big is the difference?  
Mean ± SEM of column D 1 ± 0.5676, n=4  
Mean ± SEM of column E 4.627 ± 0.1026, n=4  
Difference between means 3.627 ± 0.5769  
95% confidence interval 2.216 to 5.039  
R squared (eta squared) 0.8682

F test to compare variances  
F, DFn, Dfd 30.59, 3, 3  
P value 0.0189  
P value summary \*  
Significantly different (P < 0.05)? Yes

**Figure 3E**  
Unpaired t test  
P value 2.32E-11  
P value summary \*\*\*\*  
Significantly different (P < 0.05)? Yes  
One- or two-tailed P value? Two-tailed  
t, df t=7.205 df=156

How big is the difference?  
Mean ± SEM of column E 31.38 ± 1.249, n=79  
Mean ± SEM of column F 48.98 ± 2.099, n=79  
Difference between means 17.6 ± 2.443  
95% confidence interval 12.78 to 22.43  
R squared (eta squared) 0.2497

F test to compare variances  
F, DFn, Dfd 2.823, 78, 78  
P value <0.0001  
P value summary \*\*\*\*  
Significantly different (P < 0.05)? Yes

**Figure 3K**  
Unpaired t test  
P value 8.4E-11  
P value summary \*\*\*\*  
Significantly different (P < 0.05)? Yes  
One- or two-tailed P value? Two-tailed  
t, df t=8.877 df=38

How big is the difference?  
Mean ± SEM of column A 105.7 ± 5.727, n=20  
Mean ± SEM of column B 36.75 ± 5.25, n=20  
Difference between means -68.96 ± 7.769  
95% confidence interval -84.69 to -53.24  
R squared (eta squared) 0.6746

F test to compare variances  
F, DFn, Dfd 1.19, 19, 19  
P value 0.7084  
P value summary ns  
Significantly different (P < 0.05)? No

**Figure 4D**

Unpaired t test  
P value 3.05E-09  
P value summary \*\*\*\*  
Significantly different (P < 0.05)? Yes  
One- or two-tailed P value? Two-tailed  
t, df t=6.233 df=184

How big is the difference?  
Mean ± SEM of column G 100 ± 6.793, n=93  
Mean ± SEM of column H 54.1 ± 2.842, n=93  
Difference between means -45.9 ± 7.364  
95% confidence interval -60.42 to -31.37  
R squared (eta squared) 0.1743

F test to compare variances  
F, DFn, Dfd 5.713, 92, 92  
P value <0.0001  
P value summary \*\*\*\*  
Significantly different (P < 0.05)? Yes

**Figure 4E**  
Paired t test  
P value 0.8739  
P value summary ns  
Significantly different (P < 0.05)? No  
One- or two-tailed P value? Two-tailed  
t, df t=0.1798 df=2  
Number of pairs 3

How big is the difference?  
Mean of differences -0.02549  
SD of differences 0.2455  
SEM of differences 0.1418  
95% confidence interval -0.6354 to 0.5844  
R squared (partial eta squared) 0.01591

How effective was the pairing?  
Correlation coefficient (r) -0.1451  
P value (one tailed) 0.4537  
P value summary ns  
Was the pairing significantly effective? No

**Figure 4G**

Paired t test  
P value 0.05  
P value summary \*  
Significantly different (P < 0.05)? Yes  
One- or two-tailed P value? Two-tailed  
t, df t=3.183 df=3  
Number of pairs 4

How big is the difference?  
Mean of differences -21.11  
SD of differences 13.27  
SEM of differences 6.633  
95% confidence interval -42.22 to -0.001007  
R squared (partial eta squared) 0.7715

How effective was the pairing?  
Correlation coefficient (r) -0.07008  
P value (one tailed) 0.465  
P value summary ns  
Was the pairing significantly effective? No

**Figure 4I**

Paired t test  
P value 0.1148  
P value summary ns  
Significantly different (P < 0.05)? No  
One- or two-tailed P value? Two-tailed  
t, df t=2.691 df=2  
Number of pairs 3

How big is the difference?  
Mean of differences -8.833  
SD of differences 5.686  
SEM of differences 3.283  
95% confidence interval -22.96 to 5.292  
R squared (partial eta squared) 0.7835

How effective was the pairing?  
Correlation coefficient (r) 0.7231  
P value (one tailed) 0.2427  
P value summary ns  
Was the pairing significantly effective? No

**Figure 4K**

Unpaired t test  
P value 0.0131  
P value summary \*  
Significantly different (P < 0.05)? Yes  
One- or two-tailed P value? Two-tailed  
t, df t=2.528 df=98

How big is the difference?  
Mean ± SEM of column G 100 ± 7.731, n=51  
Mean ± SEM of column H 142.5 ± 15.16, n=49  
Difference between means 42.52 ± 16.82  
95% confidence interval 9.138 to 75.9  
R squared (eta squared) 0.06121

F test to compare variances  
F, DFn, Dfd 3.694, 48, 50  
P value <0.0001  
P value summary \*\*\*\*  
Significantly different (P < 0.05)? Yes

**Figure 4L**

Paired t test  
P value 0.0758  
P value summary ns  
Significantly different (P < 0.05)? No  
One- or two-tailed P value? Two-tailed  
t, df t=3.423 df=2  
Number of pairs 3

How big is the difference?  
Mean of differences -0.3785  
SD of differences 0.1915  
SEM of differences 0.1106  
95% confidence interval -0.8543 to 0.09724  
R squared (partial eta squared) 0.8542

How effective was the pairing?  
Correlation coefficient (r) 0.746  
P value (one tailed) 0.232  
P value summary ns  
Was the pairing significantly effective? No

**Figure 4N**

%KI67+  
Paired t test  
P value 0.0485  
P value summary \*  
Significantly different (P < 0.05)? Yes  
One- or two-tailed P value? Two-tailed  
t, df t=4.372 df=2  
Number of pairs 3

How big is the difference?  
Mean of differences 35.48  
SD of differences 14.06  
SEM of differences 8.116  
95% confidence interval 0.5627 to 70.4

%EdU+  
Paired t test  
P value 0.085  
P value summary ns  
Significantly different (P < 0.05)? No  
One- or two-tailed P value? Two-tailed  
t, df t=3.208 df=2  
Number of pairs 3

How big is the difference?  
Mean of differences 4.904  
SD of differences 2.648  
SEM of differences 1.529  
95% confidence interval -1.674 to 11.48

R squared (partial eta squared) 0.9053 R squared (partial eta squared) 0.8373

How effective was the pairing? How effective was the pairing?

Correlation coefficient (r) 0.9999 Correlation coefficient (r) 0.6835

P value (one tailed) 0.004 P value (one tailed) 0.2604

P value summary \*\* P value summary ns

Was the pairing significantly effective? Yes Was the pairing significantly effective? No

**Figure 5E**

| Gene name | logFC        | logCPM      | LR          | PValue      | FDR         |
|-----------|--------------|-------------|-------------|-------------|-------------|
| Dil1      | -2.16653603  | 5.151465748 | 44.15167485 | 3.04E-11    | 1.44E-09    |
| Dil3      | -1.605697967 | 0.774961332 | 22.23532548 | 2.41E-06    | 4.63E-05    |
| Skp2      | -2.263976591 | 5.234419896 | 73.61448822 | 9.50E-18    | 1.65E-15    |
| Birc5     | -2.351352295 | 5.058298298 | 50.3062338  | 1.32E-12    | 7.82E-11    |
| Cdk1      | -2.46413008  | 6.515691283 | 78.38606663 | 8.47E-19    | 2.09E-16    |
| Cdk2      | -1.016666564 | 5.861506896 | 12.71589534 | 0.000362561 | 0.00342061  |
| Foxm1     | -2.173282828 | 6.186910054 | 56.14989656 | 6.72E-14    | 5.20E-12    |
| Egfr      | -1.175714979 | 8.57757694  | 20.41016581 | 6.25E-06    | 0.000108167 |
| Rrm2      | -2.782875601 | 7.21832039  | 100.6004661 | 1.13E-23    | 1.28E-20    |
| Fbl       | -1.102638987 | 6.612927396 | 20.85305929 | 4.96E-06    | 8.75E-05    |

| Gene name | Counts per Million |                    |                    |
|-----------|--------------------|--------------------|--------------------|
|           | BLO567A1_FGF_GFP_1 | BLO567A2_FGF_GFP_2 | BLO567A3_FGF_GFP_3 |
| Dil1      | 2063               | 1062               | 1002               |
| Dil3      | 51                 | 70                 | 53                 |
| Skp2      | 1439               | 1722               | 1262               |
| Birc5     | 1061               | 1480               | 1408               |
| Cdk1      | 3037               | 3974               | 3997               |
| Cdk2      | 1643               | 1959               | 1926               |
| Foxm1     | 2307               | 3034               | 3130               |
| Egfr      | 13198              | 11667              | 12829              |
| Rrm2      | 5223               | 6983               | 6285               |
| Fbl       | 3547               | 3093               | 2859               |

| Gene name | Counts per Million  |                     |                     |
|-----------|---------------------|---------------------|---------------------|
|           | BLO567A10_FGF_ID4_1 | BLO567A11_FGF_ID4_2 | BLO567A12_FGF_ID4_3 |
| Dil1      | 296                 | 268                 | 359                 |
| Dil3      | 21                  | 17                  | 18                  |
| Skp2      | 276                 | 327                 | 320                 |
| Birc5     | 200                 | 183                 | 402                 |
| Cdk1      | 610                 | 552                 | 847                 |
| Cdk2      | 734                 | 723                 | 1302                |
| Foxm1     | 479                 | 573                 | 844                 |
| Egfr      | 6884                | 4936                | 4848                |
| Rrm2      | 1067                | 756                 | 864                 |
| Fbl       | 1497                | 1460                | 1472                |

**Figure 6C**

| Tukey's multiple comparisons test | Mean Diff. | 95.00% CI of diff. | Significant? | Summary | Adjusted P Value |
|-----------------------------------|------------|--------------------|--------------|---------|------------------|
| Id4 fl/+ vs. Id4 fl/fl            | -7.349     | -14.2 to -0.4996   | Yes          | *       | 0.0381           |
| Id4 fl/+ vs. Id4 +/-              | 3.504      | -3.346 to 10.35    | No           | ns      | 0.3276           |
| Id4 fl/fl vs. Id4 +/-             | 10.85      | 4.003 to 17.7      | Yes          | **      | 0.0067           |

  

| Test details           | Mean 1 | Mean 2 | Mean Diff. | SE of diff. | N1 |
|------------------------|--------|--------|------------|-------------|----|
| Id4 fl/+ vs. Id4 fl/fl | 7.937  | 15.29  | -7.349     | 2.232       | 4  |
| Id4 fl/+ vs. Id4 +/-   | 7.937  | 4.433  | 3.504      | 2.232       | 4  |
| Id4 fl/fl vs. Id4 +/-  | 15.29  | 4.433  | 10.85      | 2.232       | 4  |

**Figure 6D**

| Unpaired t test       | P value     | P value summary | Significantly different (P < 0.05)? | One- or two-tailed P value? | t, df          |
|-----------------------|-------------|-----------------|-------------------------------------|-----------------------------|----------------|
| Column R vs. Column Q | 2.01749E-05 | ****            | Yes                                 | Two-tailed                  | t=4.313 df=413 |

  

| How big is the difference? | Mean ± SEM of column Q | Mean ± SEM of column R | Difference between means | 95% confidence interval | R squared (eta squared) |
|----------------------------|------------------------|------------------------|--------------------------|-------------------------|-------------------------|
|                            | 100 ± 6.474, n=236     | 161.6 ± 14, n=179      | 61.57 ± 14.27            | 33.51 to 89.63          | 0.0431                  |

  

| F test to compare variances | F, DFn, Dfd     | P value | P value summary | Significantly different (P < 0.05)? |
|-----------------------------|-----------------|---------|-----------------|-------------------------------------|
|                             | 3.546, 178, 235 | <0.0001 | ****            | Yes                                 |

**Figure 6E**

| Tukey's multiple comparisons test | Mean Diff. | 95.00% CI of diff. | Significant? | Summary | Adjusted P Value |
|-----------------------------------|------------|--------------------|--------------|---------|------------------|
| Id4 +/fl vs. Id4 fl/fl            | -2.069     | -5.672 to 1.534    | No           | ns      | 0.3157           |
| Id4 +/fl vs. Combined Id4wt       | 0.1065     | -3.497 to 3.71     | No           | ns      | 0.9967           |
| Id4 fl/fl vs. Combined Id4wt      | 2.176      | -1.588 to 5.939    | No           | ns      | 0.3113           |

  

| Test details                 | Mean 1 | Mean 2 | Mean Diff. | SE of diff. | n1 |
|------------------------------|--------|--------|------------|-------------|----|
| Id4 +/fl vs. Id4 fl/fl       | 3.151  | 5.22   | -2.069     | 1.365       | 6  |
| Id4 +/fl vs. Combined Id4wt  | 3.151  | 3.044  | 0.1065     | 1.365       | 6  |
| Id4 fl/fl vs. Combined Id4wt | 5.22   | 3.044  | 2.176      | 1.425       | 5  |

B-C  
B-E  
C-E

n2

q

DF

|   |        |    |
|---|--------|----|
| 5 | 2.144  | 13 |
| 5 | 0.1103 | 13 |
| 5 | 2.158  | 13 |

**Figure 6G**

Number of families 1  
 Number of comparisons per family 3  
 Alpha 0.05

| Tukey's multiple comparisons test | Mean Diff. | 95.00% CI of diff. | Significant? | Summary | Adjusted P Value |
|-----------------------------------|------------|--------------------|--------------|---------|------------------|
| ld4 +/- vs. ld4 fl/+              | -1.336     | -7.003 to 4.331    | No           | ns      | 0.7595           |
| ld4 +/- vs. ld4 fl/fl             | -9.593     | -15.26 to -3.927   | Yes          | **      | 0.0049           |
| ld4 fl/+ vs. ld4 fl/fl            | -8.257     | -13.92 to -2.591   | Yes          | *       | 0.0101           |

| Test details           | Mean 1 | Mean 2 | Mean Diff. | SE of diff. | N1    |   |
|------------------------|--------|--------|------------|-------------|-------|---|
| ld4 +/- vs. ld4 fl/+   | 4.142  |        | 5.478      | -1.336      | 1.847 | 4 |
| ld4 +/- vs. ld4 fl/fl  | 4.142  |        | 13.73      | -9.593      | 1.847 | 4 |
| ld4 fl/+ vs. ld4 fl/fl | 5.478  |        | 13.73      | -8.257      | 1.847 | 4 |
|                        |        |        | N2         | q           | DF    |   |
|                        |        |        |            | 4           | 1.023 | 6 |
|                        |        |        |            | 4           | 7.346 | 6 |
|                        |        |        |            | 4           | 6.323 | 6 |

**Figure 6H**

Number of families 1  
 Number of comparisons per family 3  
 Alpha 0.05

| Tukey's multiple comparisons test | Mean Diff. | 95.00% CI of diff. | Significant? | Summary | Adjusted P Value |
|-----------------------------------|------------|--------------------|--------------|---------|------------------|
| ld4 fl/+ vs. ld4 fl/fl            | -2.53      | -4.086 to -0.9735  | Yes          | **      | 0.0026           |
| ld4 fl/+ vs. Combined ld4wt       | -0.1114    | -1.668 to 1.445    | No           | ns      | 0.9801           |
| ld4 fl/fl vs. Combined ld4wt      | 2.419      | 0.8621 to 3.975    | Yes          | **      | 0.0036           |

| Test details                 | Mean 1 | Mean 2 | Mean Diff. | SE of diff. | n1     |    |
|------------------------------|--------|--------|------------|-------------|--------|----|
| ld4 fl/+ vs. ld4 fl/fl       | 2.658  |        | 5.188      | -2.53       | 0.5834 | 5  |
| ld4 fl/+ vs. Combined ld4wt  | 2.658  |        | 2.769      | -0.1114     | 0.5834 | 5  |
| ld4 fl/fl vs. Combined ld4wt | 5.188  |        | 2.769      | 2.419       | 0.5834 | 5  |
|                              |        |        | C-D        |             |        |    |
|                              |        |        | C-E        |             |        |    |
|                              |        |        | D-E        |             |        |    |
|                              |        |        | n2         | q           | DF     |    |
|                              |        |        |            | 5           | 6.133  | 12 |
|                              |        |        |            | 5           | 0.2701 | 12 |
|                              |        |        |            | 5           | 5.863  | 12 |

**Figure 6J**

Unpaired t test  
 P value \*\* 0.0016  
 P value summary  
 Significantly different (P < 0.05)? Yes  
 One- or two-tailed P value? Two-tailed  
 t, df t=7.658 df=4  
 How big is the difference?  
 Mean ± SEM of column A 38.37 ± 4.561, n=3  
 Mean ± SEM of column B 74.16 ± 1.017, n=3  
 Difference between means 35.79 ± 4.673  
 95% confidence interval 22.81 to 48.76  
 R squared (eta squared) 0.9361  
 F test to compare variances  
 F, DFn, Dfd 20.13, 2, 2  
 P value 0.0946  
 P value summary ns  
 Significantly different (P < 0.05)? No

**Figure 6L**

Unpaired t test  
 P value \*\*\*\* 1.87108E-06  
 P value summary  
 Significantly different (P < 0.05)? Yes  
 One- or two-tailed P value? Two-tailed  
 t, df t=42.28 df=4  
 How big is the difference?  
 Mean ± SEM of column B 9.779 ± 1.049, n=3  
 Mean ± SEM of column D 75.31 ± 1.141, n=3  
 Difference between means 65.54 ± 1.55  
 95% confidence interval 61.23 to 69.84  
 R squared (eta squared) 0.9978  
 F test to compare variances  
 F, DFn, Dfd 1.182, 2, 2  
 P value 0.9165  
 P value summary ns  
 Significantly different (P < 0.05)? No

Supplementary Figures Summary Statistics

Figure S16

| Multiple tests | Discovery? | P value     | Mean1 | Mean2 | Difference | SE of difference | t ratio | df | q value    |
|----------------|------------|-------------|-------|-------|------------|------------------|---------|----|------------|
| 0              | No         | 0.38759549  | 1.178 | 1.435 | -0.257     | 0.2053           | 0.9687  | 4  | 0.39143205 |
| 10             | No         | 0.02072825  | 1.2   | 1.902 | -0.702     | 0.1884           | 3.706   | 4  | 0.04768862 |
| 30             | No         | 0.00595255  | 1.084 | 3.106 | -2.022     | 0.5989           | 3.428   | 4  | 0.04178562 |
| 60             | No         | 0.023656159 | 1.028 | 3.314 | -2.286     | 0.6427           | 3.557   | 4  | 0.04478862 |
| 120            | No         | 0.232781025 | 1.169 | 2.391 | -1.222     | 0.8607           | 1.405   | 4  | 0.29380644 |

Figure S11

Unpaired t test

P value summary: <math>+0.0000000000001</math>

Significantly different (P < 0.05)? Yes

One- or two-tailed P value? Two-tailed

t, df: 15.16, df=415

How big is the difference?

Mean ± SEM of column M: 34.62 ± 0.7823, n=218

Mean ± SEM of column N: 30.4 ± 0.292, n=199

Difference between means: 65.38 ± 4.175

95% confidence interval: 57.18 to 73.59

R squared (eta squared): 0.3715

F test to compare variances

F, DFs, Df: 29.71, 198, 217

P value: <math>+0.001</math>

Significantly different (P < 0.05)? Yes

Figure S2L

| Time | Discovery? | P value    | Mean1  | Mean2   | Difference | SE of difference | t ratio | df | q value    |
|------|------------|------------|--------|---------|------------|------------------|---------|----|------------|
| 0    | No         | 0.3730097  | 1      | 1       | -1.667E-08 | 1.667E-08        | 4.24    | 4  | 0.18891999 |
| 15   | Yes        | 0.01026026 | 1.12   | 0.659   | 0.4338     | 0.1023           | 4.24    | 4  | 0.00857255 |
| 30   | Yes        | 0.00157503 | 0.9927 | 0.4888  | 0.5039     | 0.0954           | 7.642   | 4  | 0.00190595 |
| 60   | Yes        | 0.00025643 | 0.9135 | 0.3477  | 0.5658     | 0.0653           | 9.049   | 4  | 0.00120291 |
| 120  | Yes        | 0.01473161 | 0.7754 | 0.1621  | 0.6133     | 0.1482           | 4.11    | 4  | 0.00827355 |
| 240  | Yes        | 0.00093988 | 0.3403 | 0.02546 | 0.3148     | 0.0288           | 10.93   | 4  | 0.00120493 |

Figure S3C

Unpaired t test

P value: 0.007

Significantly different (P < 0.05)? Yes

One- or two-tailed P value? Two-tailed

t, df: 12.88, df=36

How big is the difference?

Mean ± SEM of column D: 80.36 ± 7.817, n=19

Mean ± SEM of column E: 114.2 ± 8.901, n=19

Difference between means: 33.86 ± 11.85

95% confidence interval: 9.857 to 57.91

R squared (eta squared): 0.1852

F test to compare variances

F, DFs, Df: 1.297, 18, 18

P value: 0.5875

Significantly different (P < 0.05)? No

Figure S4A

Unpaired t test

P value summary: \*

Significantly different (P < 0.05)? Yes

One- or two-tailed P value? Two-tailed

t, df: 11.478, df=3

How big is the difference?

Mean ± SEM of column B: 5.912 ± 1.314, n=3

Mean ± SEM of column C: 15.56 ± 1.111, n=2

Difference between means: 18.614 ± 1.377

95% confidence interval: 2.635 to 14.65

R squared (eta squared): 0.8748

F test to compare variances

F, DFs, Df: 1.297, 2, 2

P value: 0.5875

Significantly different (P < 0.05)? No

Figure S4E

| Column C vs. Column B | Column D vs. Column B | Column E vs. Column B | Column F vs. Column B |
|-----------------------|-----------------------|-----------------------|-----------------------|
| 161                   | 162                   | 163                   | 164                   |
| Column C              | Column D              | Column E              | Column F              |
| vs.                   | vs.                   | vs.                   | vs.                   |
| Empty                 | Empty                 | Empty                 | Empty                 |

Unpaired t test

P value: 0.0003

Significantly different (P < 0.05)? Yes

One- or two-tailed P value? Two-tailed

t, df: 11.478, df=3

How big is the difference?

Mean ± SEM of column B: 14.16 ± 0.9912, n=3

Mean ± SEM of column D: 7.073 ± 0.9516, n=3

Difference between means: -7.082 ± 1.139

95% confidence interval: -10.24 to -3.919

R squared (eta squared): 0.9006

F test to compare variances

F, DFs, Df: 3.115, 2, 2

P value: 0.48

Significantly different (P < 0.05)? No

Figure S4F

| Column B vs. Column A | Column C vs. Column A | Column D vs. Column A | Column E vs. Column A | Column F vs. Column A |
|-----------------------|-----------------------|-----------------------|-----------------------|-----------------------|
| 161 ABC 20M each 48h  | 162 ABC 20M each 48h  | 163 ABC 20M each 48h  | 164 ABC 20M each 48h  | 165 ABC 20M each 48h  |
| vs.                   | vs.                   | vs.                   | vs.                   | vs.                   |
| Scrambled 60M 48h     | Scrambled 60M 48h     | Scrambled 60M 48h     | Scrambled 60M 48h     | Scrambled 60M 48h     |

Paired t test

P value: 0.488

Significantly different (P < 0.05)? No

One- or two-tailed P value? Two-tailed

t, df: 10.8421, df=2

Number of pairs: 3

How big is the difference?

Mean of differences: 18.27

SD of differences: 37.46

SEM of differences: 21.86

95% confidence interval: -74.85 to 111.3

R squared (partial eta squared): 0.2619

How effective was the pairing?

Correlation coefficient (r): 0.0279

P value (one tailed): 0.9863

Was the pairing significantly effective? No

Figure S4G

| Column B vs. Column A | Column C vs. Column A | Column D vs. Column A | Column E vs. Column A | Column F vs. Column A | Column G vs. Column A |
|-----------------------|-----------------------|-----------------------|-----------------------|-----------------------|-----------------------|
| 161 ABC 20M each 48h  | 162 ABC 20M each 48h  | 163 ABC 20M each 48h  | 164 ABC 20M each 48h  | 165 ABC 20M each 48h  | 166 ABC 20M each 48h  |
| vs.                   | vs.                   | vs.                   | vs.                   | vs.                   | vs.                   |
| Scrambled 60M 48h     | Scrambled 60M 48h     | Scrambled 60M 48h     | Scrambled 60M 48h     | Scrambled 60M 48h     | Scrambled 60M 48h     |

Paired t test

P value: 0.004

Significantly different (P < 0.05)? Yes

One- or two-tailed P value? Two-tailed

t, df: 11.357, df=2

Number of pairs: 3

How big is the difference?

Mean of differences: -0.58

SD of differences: 11.45

SEM of differences: 6.76

95% confidence interval: -67.96 to 38.21

R squared (partial eta squared): 0.9916

How effective was the pairing?

Correlation coefficient (r): -0.9899

P value (one tailed): 0.0519

Was the pairing significantly effective? No

Figure S4H

| Column F vs. Column A | Column I vs. Column A | Column J vs. Column A | Column K vs. Column A | Column L vs. Column A | Column M vs. Column A |
|-----------------------|-----------------------|-----------------------|-----------------------|-----------------------|-----------------------|
| 161 ABC 20M each 48h  | 164 ABC 20M each 48h  | 165 ABC 20M each 48h  | 166 ABC 20M each 48h  | 167 ABC 20M each 48h  | 168 ABC 20M each 48h  |
| vs.                   | vs.                   | vs.                   | vs.                   | vs.                   | vs.                   |
| Scrambled 60M         | Scrambled 60M         | Scrambled 60M         | Scrambled 60M         | Scrambled 60M         | Scrambled 60M         |

Unpaired t test

P value: 0.0006

Significantly different (P < 0.05)? Yes

One- or two-tailed P value? Two-tailed

t, df: 11.401, df=2

Number of pairs: 3

How big is the difference?

Mean of differences: -30.0

SD of differences: 4.45

SEM of differences: 2.59

95% confidence interval: -39.23 to 20.8

R squared (partial eta squared): 0.9899

How effective was the pairing?

Correlation coefficient (r): 0.884

P value (one tailed): 0.0568

Was the pairing significantly effective? No

Figure S3G

Unpaired t test

P value: <math>+0.9999</math>

Significantly different (P < 0.05)? No

One- or two-tailed P value? Two-tailed

t, df: 11.856-093, df=373

How big is the difference?

Mean ± SEM of column C: 100 ± 4.972, n=57

Mean ± SEM of column D: 100 ± 2.408, n=318

Difference between means: 1.122E-008 ± 6.0568

95% confidence interval: -11.93 to 11.93

R squared (eta squared): 0.173E-21

F test to compare variances

F, DFs, Df: 1.309, 517, 56

P value: 0.2221

Significantly different (P < 0.05)? No

Figure S4B

Unpaired t test

P value summary: ns

Significantly different (P < 0.05)? No

One- or two-tailed P value? Two-tailed

t, df: 11.7701, df=4

How big is the difference?

Mean ± SEM of column B: 27.5 ± 4.204, n=3

Mean ± SEM of column L: 22.81 ± 3.645, n=3

Difference between means: 4.693 ± 1.551

95% confidence interval: -2.83 to 12.75

R squared (eta squared): 0.1291

F test to compare variances

F, DFs, Df: 2.038, 2, 2

P value: 0.6583

Significantly different (P < 0.05)? No

Figure S4C

| Column D vs. Column B | Column E vs. Column B | Column F vs. Column B |
|-----------------------|-----------------------|-----------------------|
| 162                   | 163                   | 164                   |
| Column D              | Column E              | Column F              |
| vs.                   | vs.                   | vs.                   |
| Empty                 | Empty                 | Empty                 |

Unpaired t test

P value: 0.0006

Significantly different (P < 0.05)? Yes

One- or two-tailed P value? Two-tailed

t, df: 11.9791, df=4

How big is the difference?

Mean ± SEM of column B: 14.16 ± 0.9912, n=3

Mean ± SEM of column E: 14.16 ± 0.9912, n=3

Difference between means: 2.889 ± 0.5845, n=3

95% confidence interval: -11.27 to 1.51

R squared (eta squared): 0.9599

F test to compare variances

F, DFs, Df: 2.875, 2, 2

P value: 0.5161

Significantly different (P < 0.05)? No

Figure S4D

| Column D vs. Column A | Column E vs. Column A | Column F vs. Column A |
|-----------------------|-----------------------|-----------------------|
| 162                   | 163                   | 164                   |
| Column D              | Column E              | Column F              |
| vs.                   | vs.                   | vs.                   |
| Empty                 | Empty                 | Empty                 |

Unpaired t test

P value: 0.0006

Significantly different (P < 0.05)? Yes

One- or two-tailed P value? Two-tailed

t, df: 11.9791, df=4

How big is the difference?

Mean ± SEM of column B: 14.16 ± 0.9912, n=3

Mean ± SEM of column F: 2.889 ± 0.5845, n=3

Difference between means: -14.46 ± 0.072

95% confidence interval: -14.46 to 0.072

R squared (eta squared): 0.9599

F test to compare variances

F, DFs, Df: 2.875, 2, 2

P value: 0.5161

Significantly different (P < 0.05)? No



|                                     |             |        |                                     |             |        |
|-------------------------------------|-------------|--------|-------------------------------------|-------------|--------|
| R squared (eta squared)             |             | 0.8646 | R squared (eta squared)             |             | 0.9668 |
| F test to compare variances         |             |        | F test to compare variances         |             |        |
| F, DF(1, 24)                        | 5.622, 2, 2 |        | F, DF(1, 24)                        | 1.833, 2, 2 |        |
| P value                             |             | 0.302  | P value                             |             | 0.7061 |
| P value summary                     | ns          |        | P value summary                     | ns          |        |
| Significantly different (P < 0.05)? | No          |        | Significantly different (P < 0.05)? | No          |        |
